# Supplementary material
Source: publisher site journal article supplement (https://www.kjim.org/upload/media/kjim-2025-101-Supplementary-Fig-1.pdf)
Supplement: Supplementary file 1 [file kjim-2025-101-Supplementary-Fig-1.pdf]

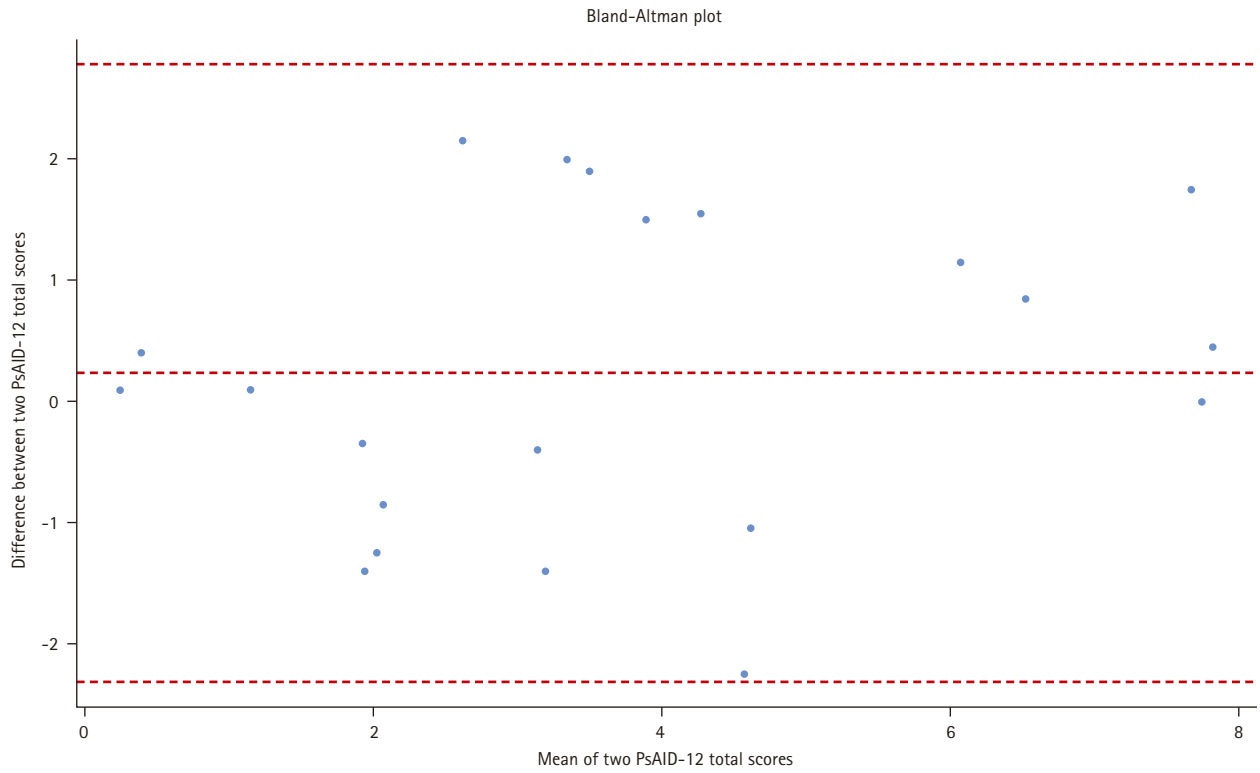

**Supplementary Figure 1.** Bland–Altman plot for agreement between two PsAID-12 measurements. PsAID-12, Psoriatic Arthritis Impact of Disease.
